# Supplementary figures and images for: Lycopene ameliorates systemic inflammation-induced synaptic dysfunction via improving insulin resistance and mitochondrial dysfunction in the liver–brain axis
Source: Royal Society of Chemistry journal article supplement (doi:10.1039/c8fo02460j), 2019-01-01

**S.Fig. 1**

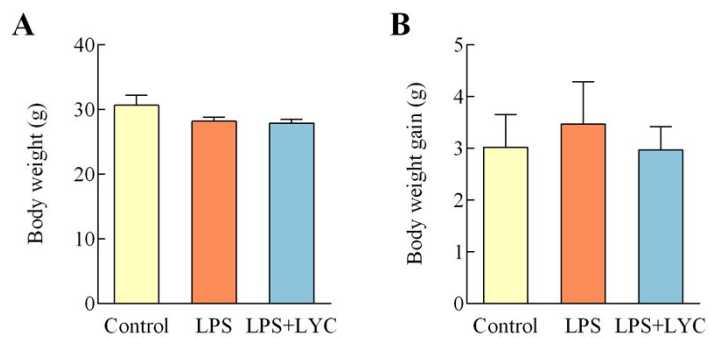

1

2 *S.Fig.1 The effect of LYC on mice body weight*

3 (A) Mice body weight; (B) Mice body weigh gain.

Supplement: c8fo02460j1.pdf [file c8fo02460j1.pdf]
